# Supplementary material for: Pancreatic cancer prognosis is predicted by an ATAC-array technology for assessing chromatin accessibility
Source: PubMed Central journal article supplement (PMC8144607; doi:10.1038/s41467-021-23237-2), 2021-05-24
Supplement: 41467_2021_23237_MOESM13_ESM.pdf [file 41467_2021_23237_MOESM13_ESM.pdf]

**Title:** Supplementary Data 1:

**Description:** Upregulated and downregulated genes in EpCAM-sorted PDAC malignant cells

**Title:** Supplementary Data 2:

**Description:** Patient clinical records (n=54)

**Title:** Supplementary Data 3:

**Description:** List of 1092 ATAC-Seq peaks

**Title:** Supplementary Data 4:

**Description:** HNF1b TF-binding motif identified to the nearest genes

**Title:** Supplementary Data 5:

**Description:** ZKSCAN1 TF-binding motif identified to the nearest genes

**Title:** Supplementary Data 6:

**Description:** ATAC-Array cohort (n=49)

**Title:** Supplementary Data 7:

**Description:** ATAC-Array HNF1b common cohort (n=39)

**Title:** Supplementary Data 8:

**Description:** Organoids that are overlapping with ATAC-Seq/Array patient cohort (n=12)

**Title:** Supplementary Data 9:

**Description:** Validation cohort of organoids that are not overlapping with ATAC-Seq/Array patient cohort (n=14)

**Title:** Supplementary Data 10:

**Description:** Primers used to prepare ATAC-seq libraries (Buenrostro et al, Nat Method 2013 ref 10 of the manuscript)
